# Supplementary material for: DNA sequence context as a marker of CpG methylation instability in normal and cancer tissues
Source: PubMed Central journal article supplement (PMC6997448; doi:10.1038/s41598-020-58331-w), 2020-02-03
Supplement: 41598_2020_58331_MOESM1_ESM.pdf [file 41598_2020_58331_MOESM1_ESM.pdf]

# DNA sequence context as a marker of CpG methylation instability in normal and cancer tissues

Giovanni Scala<sup>1</sup>, Antonio Federico<sup>1</sup>, Domenico Palumbo<sup>2</sup>, Sergio Cocozza<sup>2</sup>, Dario Greco<sup>1,3,4,\*</sup>

1. Faculty of Medicine and Health Technology, Tampere University, Finland;
2. Department of Molecular Medicine and Medical Biotechnology, University of Naples “Federico II”, Italy;
3. BioMediTech Institute, Tampere University, Finland;
4. Institute of Biotechnology, University of Helsinki, Finland.

\* Corresponding author: [dario.greco@tuni.fi](mailto:dario.greco@tuni.fi)

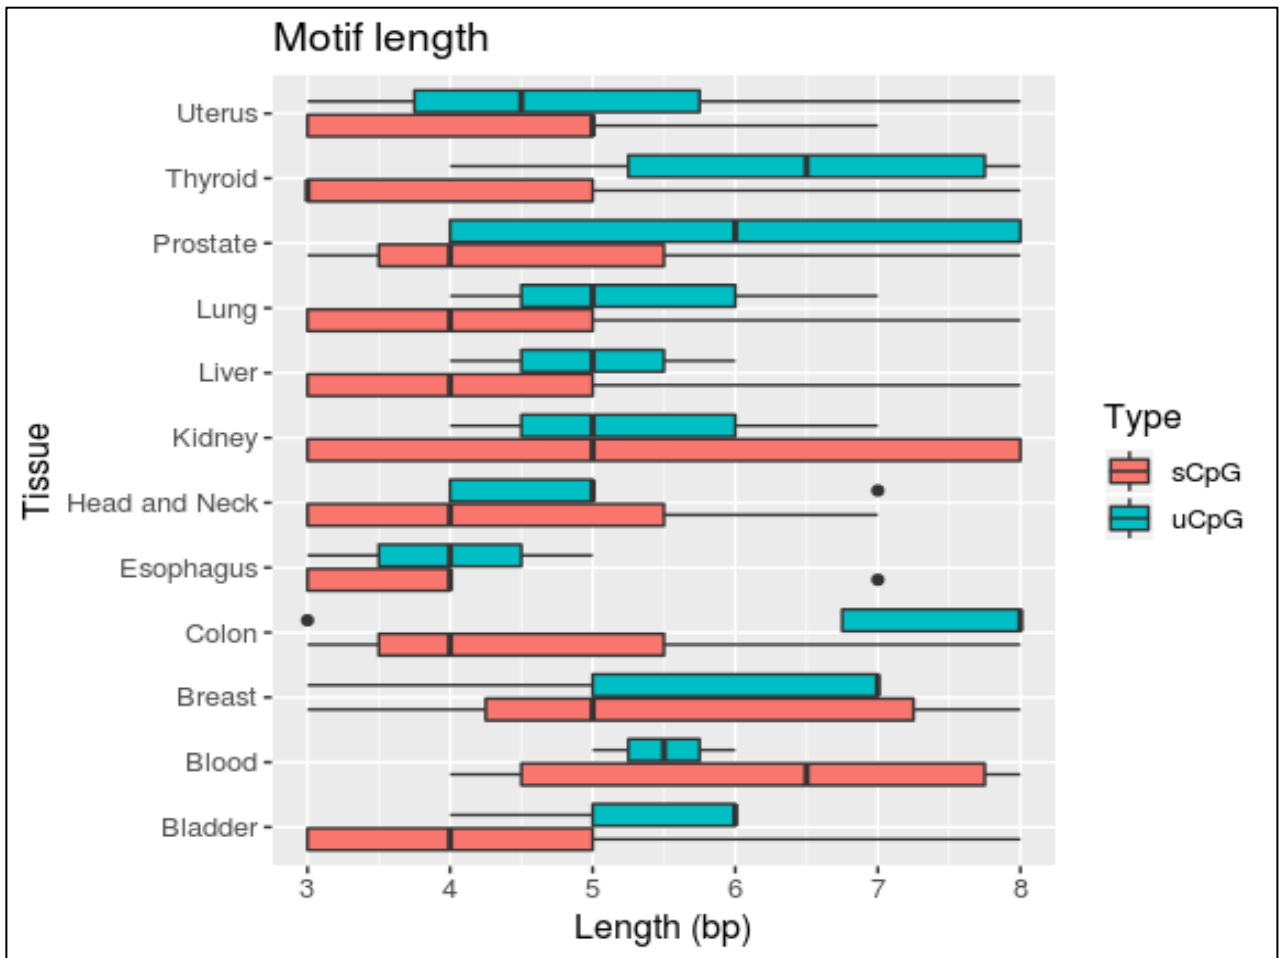

**Figure S1.** Distribution sCpG (blue) and uCpG (red) motif sizes for each normal tissue.

We compared the discovered motif among the different tissues by computing a distance function based on their sequence similarity and grouped them using hierarchical clustering (Figure 1).

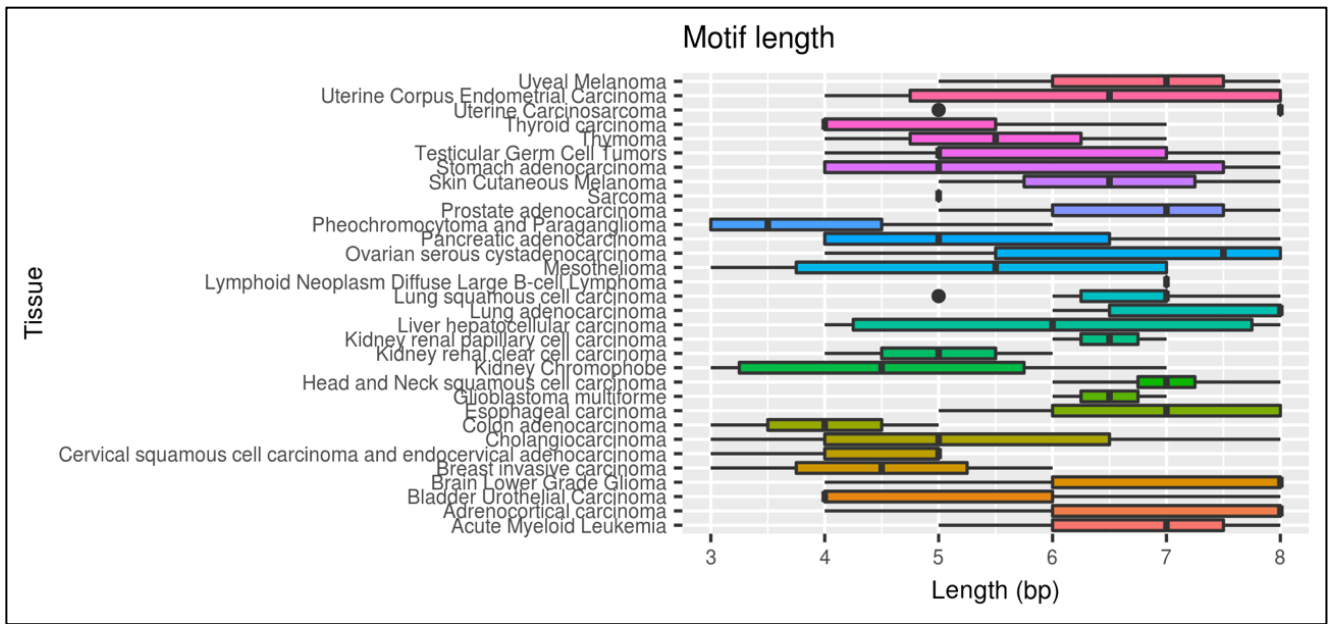

**Figure S2.** Distribution of motifs length for each cancer type.

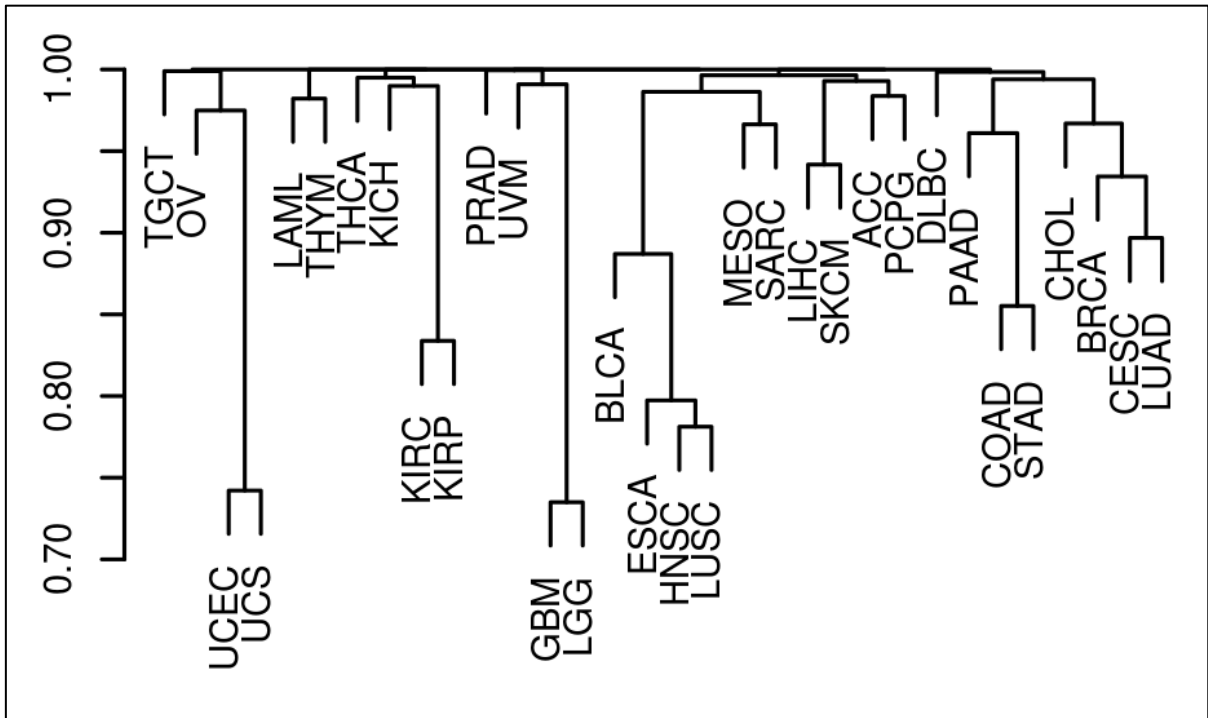

**Figure S3. Clustering of the different cancer tissues based on the iDMC set similarity.** The dendrogram reports the set similarity of the original input sets. Pairwise similarity is computed as the complement to one of the Jaccard similarity.

**Table S1.** Normal tissues considered in the study

| <b>CODE</b> | <b>Tissue</b> | <b>Dataset</b> |
|-------------|---------------|----------------|
| BLCA        | Bladder       | TCGA           |
| EPIC        | Blood         | EPIC ITALY     |
| BRCA        | Breast        | TCGA           |
| COAD        | Colon         | TCGA           |
| ESCA        | Esophagus     | TCGA           |
| HNSC        | Head and Neck | TCGA           |
| KIRC        | Kidney        | TCGA           |
| LIHC        | Liver         | TCGA           |
| LUSC        | Lung          | TCGA           |
| PRAD        | Prostate      | TCGA           |
| THCA        | Thyroid       | TCGA           |
| UCEC        | Uterus        | TCGA           |

**Table S2.** DNA motifs associated with SCpGs and uCpGs in normal tissues. Columns legend:  
**Variance** - uCpGs (unstable CpGs) and sCpGs (stable CpGs); **Motif** - the sequence motif identified; **Consensus Sequence** - motif consensus sequences; **Cluster** - motif cluster id; **Length** - length of the identified motif; **Positive** - number of CpGs with the corresponding motif in the input set; **Total positive** - number of total CpGs in the input set; **Negative** - number of CpGs with the corresponding motif in the background set; **Total negative** - number of total CpGs in the background set; **Positive ratio** - ratio between Positive and Total positive; **Negative ratio** - ratio between Negative and Total negative; **p-value** - motif enrichment P-value; **e-value** - motif enrichment e-value.

|    | A         | B             | C        | D        | E                  | F        | G      | H        | I              | J        | K              | L              | M              | N           | O           |            |
|----|-----------|---------------|----------|----------|--------------------|----------|--------|----------|----------------|----------|----------------|----------------|----------------|-------------|-------------|------------|
| 1  | Tissue ID | Tissue        | Variance | Motif    | Consensus Sequence | Cluster  | Length | Positive | Total positive | Negative | Total negative | Positive ratio | Negative ratio | p-value     | e-value     |            |
| 2  | PRAD      | Prostate      | uCpGs    | GCGCTCMA | GCGCTCMA           | 23       | 8      | 29       | 3369           | 1404     | 485512         | 0.008607896    | 0.002891793    | 0.0000005   | 0.015       |            |
| 3  | THCA      | Thyroid       | uCpGs    | ATGASTCA |                    | 19       | 8      | 23       | 3401           | 865      | 485512         | 0.006762717    | 0.001781624    | 0.00000014  | 0.0053      |            |
| 4  | PRAD      | Prostate      | sCpGs    | TCACGTGA | TCACGTGA           | 29       | 8      | 15       | 3369           | 473      | 485512         | 0.00445236     | 0.000974229    | 0.00000023  | 0.046       |            |
| 5  | THCA      | Thyroid       | sCpGs    | TGACGTCA |                    | 29       | 8      | 32       | 3399           | 741      | 485512         | 0.009414534    | 0.001526224    | 2.8E-15     | 6E-11       |            |
| 6  | LUSC      | Lung2         | sCpGs    | TGACGTCA |                    | 29       | 8      | 31       | 3403           | 741      | 485512         | 0.009109609    | 0.001526224    | 1.8E-14     | 3.5E-10     |            |
| 7  | LIHC      | Liver         | sCpGs    | TGACGTCA |                    | 29       | 8      | 22       | 3336           | 741      | 485512         | 0.006594724    | 0.001526224    | 0.000000029 | 0.00058     |            |
| 8  | COAD      | Colon         | sCpGs    | TGACGTCA |                    | 29       | 8      | 25       | 3343           | 741      | 485512         | 0.007478313    | 0.001526224    | 3E-10       | 0.0000061   |            |
| 9  | KIRC      | Kidney2       | sCpGs    | TGACGTCA |                    | 29       | 8      | 28       | 3297           | 741      | 485512         | 0.008492569    | 0.001526224    | 1.5E-12     | 0.000000031 |            |
| 10 | UCEC      | Uterus2       | uCpGs    | TTCGAAGW |                    | TTCGAAGW | 26     | 8        | 10             | 3374     | 184            | 485512         | 0.002963841    | 0.000378981 | 0.0000013   | 0.027      |
| 11 | EPIC      | Blood3        | sCpGs    | ACCTGSAG |                    | ACCTGSAG | 32     | 8        | 36             | 2065     | 2482           | 485512         | 0.017433414    | 0.005112129 | 6.7E-10     | 0.000017   |
| 12 | EPIC      | Blood3        | sCpGs    | TCTGGRAA |                    | TCTGGRAA | 33     | 8        | 27             | 2065     | 1949           | 485512         | 0.013075061    | 0.004014319 | 0.000000021 | 0.005      |
| 13 | COAD      | Colon         | uCpGs    | AAAASCAC |                    | AAWASCRC | 9      | 8        | 25             | 3341     | 1157           | 485512         | 0.00748279     | 0.002383051 | 0.0000012   | 0.034      |
| 14 | COAD      | Colon         | uCpGs    | CACACMCC | CACACMCC           | 7        | 8      | 39       | 3341           | 2116     | 485512         | 0.011673152    | 0.004358286    | 0.000000089 | 0.0026      |            |
| 15 | BRCA      | Breast        | sCpGs    | CACGTGAC | CACGTGAC           | 28       | 8      | 21       | 3402           | 865      | 485512         | 0.00617284     | 0.001781624    | 0.0000019   | 0.039       |            |
| 16 | KIRC      | Kidney2       | sCpGs    | CACGTGAC |                    | 28       | 8      | 23       | 3297           | 964      | 485512         | 0.006976039    | 0.001985533    | 0.0000005   | 0.01        |            |
| 17 | BLCA      | Bladder       | sCpGs    | CCATTGGY | CBATTGCG           | 27       | 8      | 21       | 3425           | 824      | 485512         | 0.006131387    | 0.001697177    | 0.000001    | 0.018       |            |
| 18 | BRCA      | Breast        | sCpGs    | CBATTGGC |                    | 27       | 8      | 22       | 3402           | 844      | 485512         | 0.006466784    | 0.001738371    | 0.00000035  | 0.0072      |            |
| 19 | THCA      | Thyroid       | uCpGs    | CCAGWTAC | CSRRTWVC           | 8        | 8      | 19       | 3401           | 695      | 485512         | 0.005586592    | 0.001431479    | 0.0000011   | 0.038       |            |
| 20 | COAD      | Colon         | uCpGs    | CSGTTTCC |                    | 8        | 8      | 28       | 3341           | 1340     | 485512         | 0.008380724    | 0.002759973    | 0.00000053  | 0.016       |            |
| 21 | PRAD      | Prostate      | uCpGs    | CGAATTSC |                    | 8        | 8      | 16       | 3369           | 423      | 485512         | 0.004749184    | 0.000871245    | 0.00000011  | 0.0034      |            |
| 22 | LUSC      | Lung2         | uCpGs    | GGYGTGY  | GGHRTKY            | 22       | 7      | 141      | 3385           | 11772    | 485512         | 0.041654357    | 0.024246569    | 1.5E-09     | 0.000059    |            |
| 23 | THCA      | Thyroid       | uCpGs    | GGAATKY  |                    | 22       | 7      | 108      | 3401           | 7723     | 485512         | 0.031755366    | 0.015906919    | 5.7E-11     | 0.0000022   |            |
| 24 | BRCA      | Breast        | uCpGs    | GGGAGAS  | GGGAGAS            | 6        | 7      | 109      | 3401           | 9103     | 485512         | 0.032049397    | 0.018749279    | 0.000000014 | 0.0039      |            |
| 25 | HNSC      | Head and Neck | sCpGs    | ACGTSAAC | ACGTSAAC           | 36       | 7      | 65       | 3361           | 3918     | 485512         | 0.019339482    | 0.008069831    | 4.9E-10     | 0.0000099   |            |
| 26 | BRCA      | Breast        | uCpGs    | DCAGGAA  | DYAKDAA            | 5        | 7      | 131      | 3401           | 10785    | 485512         | 0.038518083    | 0.022213663    | 3.4E-09     | 0.0000099   |            |
| 27 | COAD      | Colon         | sCpGs    | CCAATCA  | CCAATCA            | 30       | 7      | 37       | 3343           | 2016     | 485512         | 0.011067903    | 0.004152318    | 0.000000021 | 0.0041      |            |
| 28 | HNSC      | Head and Neck | sCpGs    | TGACTMA  | TGACTMA            | 14       | 7      | 68       | 3360           | 3094     | 485512         | 0.020238095    | 0.006372654    | 9.3E-16     | 3.3E-11     |            |
| 29 | KIRC      | Kidney2       | uCpGs    | TGACTCA  |                    | 14       | 7      | 64       | 3297           | 2490     | 485512         | 0.019411586    | 0.005128807    | 2.2E-18     | 8.6E-14     |            |
| 30 | EPIC      | Blood3        | sCpGs    | CTTCGCR  | CTTCGCR            | 31       | 7      | 71       | 2065           | 5864     | 485512         | 0.034382567    | 0.012077971    | 2.9E-14     | 7.5E-10     |            |
| 31 | ESCA      | Esophagus     | sCpGs    | ATTGGCY  | MKTGRCY            | 34       | 7      | 54       | 3404           | 3298     | 485512         | 0.01586369     | 0.006792829    | 0.000000031 | 0.00057     |            |
| 32 | UCEC      | Uterus2       | sCpGs    | CGTGACC  |                    | 34       | 7      | 26       | 3374           | 959      | 485512         | 0.007705987    | 0.001975234    | 0.000000013 | 0.00027     |            |
| 33 | UCEC      | Uterus2       | uCpGs    | WAW      | WAW                | 25       | 3      | 1947     | 3374           | 243979   | 485512         | 0.57705987     | 0.50251899     | 3.1E-18     | 9E-14       |            |
| 34 | UCEC      | Uterus2       | sCpGs    | CCG      | CCG                | 4        | 3      | 2200     | 3374           | 271269   | 485512         | 0.65204505     | 0.558727694    | 2.5E-28     | 6.5E-24     |            |
| 35 | THCA      | Thyroid       | sCpGs    | CCG      |                    | 4        | 3      | 2237     | 3399           | 272622   | 485512         | 0.658134746    | 0.561514442    | 1.6E-30     | 4.1E-26     |            |
| 36 | PRAD      | Prostate      | sCpGs    | CCG      |                    | 4        | 3      | 1040     | 3369           | 117540   | 485512         | 0.308696943    | 0.242094943    | 1.3E-18     | 2.9E-14     |            |
| 37 | LUSC      | Lung2         | sCpGs    | CCG      |                    | 4        | 3      | 2255     | 3403           | 272622   | 485512         | 0.662650602    | 0.561514442    | 2.4E-33     | 5.9E-29     |            |
| 38 | LIHC      | Liver         | sCpGs    | CCG      |                    | 4        | 3      | 957      | 3336           | 117770   | 485512         | 0.286870504    | 0.24256867     | 2.9E-09     | 0.000065    |            |
| 39 | KIRC      | Kidney2       | sCpGs    | CCG      |                    | 4        | 3      | 2154     | 3297           | 272622   | 485512         | 0.653321201    | 0.561514442    | 6E-27       | 1.5E-22     |            |
| 40 | COAD      | Colon         | sCpGs    | CCG      |                    | 4        | 3      | 2287     | 3343           | 278426   | 485512         | 0.684116063    | 0.573468833    | 2.2E-39     | 5.5E-35     |            |
| 41 | HNSC      | Head and Neck | sCpGs    | CCG      |                    | 4        | 3      | 2226     | 3361           | 272622   | 485512         | 0.662302886    | 0.561514442    | 9.4E-33     | 2.4E-28     |            |
| 42 | THCA      | Thyroid       | sCpGs    | CGW      |                    | CGD      | 4      | 3        | 1274           | 3399     | 156036         | 485512         | 0.374816122    | 0.321384435 | 3E-11       | 0.00000064 |
| 43 | BLCA      | Bladder       | sCpGs    | CGD      |                    |          | 4      | 3        | 1636           | 3425     | 191999         | 485512         | 0.477664234    | 0.395456755 | 1.6E-22     | 3.6E-18    |
| 44 | ESCA      | Esophagus     | sCpGs    | CGK      |                    |          | 4      | 3        | 1085           | 3404     | 113733         | 485512         | 0.318742656    | 0.234253736 | 2.8E-29     | 6E-25      |
| 45 | UCEC      | Uterus2       | sCpGs    | CGC      |                    |          | 4      | 3        | 2410           | 3374     | 232134         | 485512         | 0.714285714    | 0.478122065 | 3.9E-169    | 1.3E-164   |
| 46 | THCA      | Thyroid       | sCpGs    | CGC      |                    |          | 4      | 3        | 2611           | 3399     | 255170         | 485512         | 0.768167108    | 0.525568884 | 2E-186      | 6.8E-182   |
| 47 | PRAD      | Prostate      | sCpGs    | CGC      |                    |          | 4      | 3        | 1561           | 3369     | 156251         | 485512         | 0.463342238    | 0.321827267 | 4.4E-65     | 1.3E-60    |
| 48 | LUSC      | Lung2         | sCpGs    | CGC      | 4                  |          | 3      | 1214     | 3403           | 109457   | 485512         | 0.356744049    | 0.225446539    | 4E-67       | 1.1E-62     |            |
| 49 | LIHC      | Liver         | sCpGs    | CGC      | 4                  |          | 3      | 2553     | 3336           | 255170   | 485512         | 0.76528777     | 0.525568884    | 1.6E-178    | 5.1E-174    |            |
| 50 | KIRC      | Kidney2       | sCpGs    | CGC      | 4                  | 3        | 2528   | 3297     | 255170         | 485512   | 0.766757658    | 0.525568884    | 9.8E-179       | 3.1E-174    |             |            |
| 51 | HNSC      | Head and Neck | sCpGs    | CGC      | 4                  | 3        | 2574   | 3361     | 255170         | 485512   | 0.765843499    | 0.525568884    | 1.1E-180       | 3.4E-176    |             |            |
| 52 | COAD      | Colon         | sCpGs    | CGC      | 4                  | 3        | 1922   | 3343     | 184095         | 485512   | 0.574932695    | 0.379177034    | 3.4E-115       | 1E-110      |             |            |
| 53 | BLCA      | Bladder       | sCpGs    | CGC      | 4                  | 3        | 2641   | 3425     | 261601         | 485512   | 0.771094891    | 0.538814695    | 8.2E-174       | 2.8E-169    |             |            |
| 54 | BRCA      | Breast        | uCpGs    | CGM      | CGM                | 4        | 3      | 3061     | 3401           | 415148   | 485512         | 0.900029403    | 0.855072583    | 4.1E-15     | 1.6E-10     |            |
| 55 | COAD      | Colon         | uCpGs    | CGM      |                    | 4        | 3      | 2973     | 3341           | 415148   | 485512         | 0.889853337    | 0.855072583    | 2.1E-09     | 0.000086    |            |
| 56 | ESCA      | Esophagus     | sCpGs    | CGM      |                    | 4        | 3      | 2196     | 3404           | 247572   | 485512         | 0.645123384    | 0.509919425    | 8.9E-57     | 2.5E-52     |            |
| 57 | ESCA      | Esophagus     | uCpGs    | CGS      | CGS                | 4        | 3      | 2175     | 3397           | 284034   | 485512         | 0.640270827    | 0.585019526    | 3E-11       | 0.00000096  |            |
| 58 | BRCA      | Breast        | sCpGs    | CGS      |                    | 4        | 3      | 2583     | 3402           | 305571   | 485512         | 0.759259259    | 0.629378882    | 8.3E-59     | 2.4E-54     |            |
| 59 | EPIC      | Blood3        | sCpGs    | CGYB     |                    | 18       | 4      | 1887     | 2065           | 395677   | 485512         | 0.913801453    | 0.814968528    | 1.2E-36     | 4.4E-32     |            |
| 60 | ESCA      | Esophagus     | sCpGs    | CGCS     | 18                 | 4        | 2689   | 3404     | 217650         | 485512   | 0.789952996    | 0.448289641    | 0              | 0           |             |            |
| 61 | EPIC      | Blood3        | sCpGs    | CGRA     | 18                 | 4        | 553    | 2065     | 104019         | 485512   | 0.26779661     | 0.214245992    | 4.8E-09        | 0.00012     |             |            |
| 62 | PRAD      | Prostate      | uCpGs    | CGDC     | 18                 | 4        | 2039   | 3369     | 271278         | 485512   | 0.605224102    | 0.558746231    | 0.00000003     | 0.001       |             |            |
| 63 | COAD      | Colon         | sCpGs    | CGAC     | 18                 | 4        | 257    | 3343     | 26583          | 485512   | 0.076877057    | 0.054752509    | 0.000000067    | 0.0014      |             |            |

| A   | B    | C          | D     | E      | F  | G | H    | I    | J      | K      | L           | M           | N           | O          |
|-----|------|------------|-------|--------|----|---|------|------|--------|--------|-------------|-------------|-------------|------------|
| 64  | KIRC | Kidney2    | uCpGs | CGTB   | 18 | 4 | 1891 | 3297 | 257349 | 485512 | 0.573551714 | 0.53005693  | 0,00000032  | 0,012      |
| 65  | THCA | Thyroid    | uCpGs | CGTY   | 18 | 4 | 1324 | 3401 | 169118 | 485512 | 0.389297266 | 0.348329187 | 0,00000039  | 0,015      |
| 66  | HNSC | Head and n | uCpGs | AAHA   | 2  | 4 | 1700 | 3360 | 194685 | 485512 | 0.505952381 | 0.400989059 | 1,1E-34     | 4,6E-30    |
| 67  | UCEC | Uterus2    | uCpGs | AWHA   | 2  | 4 | 1624 | 3374 | 181359 | 485512 | 0.481327801 | 0.373541746 | 3,4E-37     | 1,2E-32    |
| 68  | BLCA | Bladder    | uCpGs | AKAA   | 2  | 4 | 1350 | 3401 | 171104 | 485512 | 0.396942076 | 0.352419714 | 0,000000043 | 0,0017     |
| 69  | LUSC | Lung2      | uCpGs | ATAW   | 2  | 4 | 536  | 3385 | 61228  | 485512 | 0.158345643 | 0.126110168 | 0,000000029 | 0,0011     |
| 70  | HNSC | Head and n | uCpGs | AMAY   | 2  | 4 | 1659 | 3360 | 210544 | 485512 | 0.49375     | 0.433653545 | 1,7E-12     | 0,00000006 |
| 71  | PRAD | Prostate   | uCpGs | WAAW   | 2  | 4 | 1561 | 3369 | 193818 | 485512 | 0.463342238 | 0.399203315 | 3,1E-14     | 1,3E-09    |
| 72  | LIHC | Liver      | uCpGs | ASGG   | 21 | 4 | 1893 | 3332 | 255262 | 485512 | 0.568127251 | 0.525758375 | 0,000000055 | 0,021      |
| 73  | PRAD | Prostate   | sCpGs | CGGS   | 21 | 4 | 1762 | 3369 | 191384 | 485512 | 0.523003859 | 0.394190051 | 2,2E-51     | 5,8E-47    |
| 74  | ESCA | Esophagus  | sCpGs | CSGS   | 21 | 4 | 2486 | 3404 | 257297 | 485512 | 0.730317274 | 0.529949826 | 3,3E-126    | 1,1E-121   |
| 75  | LIHC | Liver      | sCpGs | CGGS   | 21 | 4 | 1669 | 3336 | 192465 | 485512 | 0.50029976  | 0.396416566 | 7,3E-34     | 1,8E-29    |
| 76  | BLCA | Bladder    | sCpGs | BCGG   | 13 | 4 | 1996 | 3425 | 232947 | 485512 | 0.582773723 | 0.479796586 | 1,5E-33     | 4,1E-29    |
| 77  | BRCA | Breast     | sCpGs | SCGS   | 13 | 4 | 2591 | 3402 | 238355 | 485512 | 0.761610817 | 0.490935342 | 9,1E-228    | 3E-223     |
| 78  | COAD | Colon      | sCpGs | GCGC   | 13 | 4 | 2358 | 3343 | 101641 | 485512 | 0.705354472 | 0.20934807  | 0           | 0          |
| 79  | ESCA | Esophagus  | uCpGs | KCGR   | 13 | 4 | 2245 | 3397 | 271671 | 485512 | 0.660877245 | 0.559555686 | 2,3E-33     | 8,8E-29    |
| 80  | PRAD | Prostate   | sCpGs | GCGS   | 13 | 4 | 2122 | 3369 | 172467 | 485512 | 0.629860493 | 0.355227059 | 5,5E-228    | 1,8E-223   |
| 81  | COAD | Colon      | sCpGs | CCGC   | 13 | 4 | 2238 | 3343 | 174394 | 485512 | 0.66945857  | 0.359196065 | 8,6E-288    | 2,9E-283   |
| 82  | LUSC | Lung2      | sCpGs | BCGC   | 13 | 4 | 2102 | 3403 | 181382 | 485512 | 0.617690273 | 0.373589118 | 4,2E-181    | 1,3E-176   |
| 83  | BLCA | Bladder    | uCpGs | AAACRM | 1  | 6 | 343  | 3401 | 31127  | 485512 | 0.10085269  | 0.064111701 | 3,8E-16     | 1,5E-11    |
| 84  | THCA | Thyroid    | uCpGs | CAASAG | 1  | 6 | 177  | 3401 | 16809  | 485512 | 0.052043517 | 0.034621183 | 0,000000014 | 0,0055     |
| 85  | LIHC | Liver      | uCpGs | AGCYCG | 20 | 6 | 252  | 3332 | 25182  | 485512 | 0.075630252 | 0.051866895 | 4,2E-09     | 0,00016    |
| 86  | EPIC | Blood3     | sCpGs | AGCTCS | 20 | 6 | 112  | 2065 | 16526  | 485512 | 0.054237288 | 0.034038294 | 0,00000019  | 0,045      |
| 87  | EPIC | Blood3     | uCpGs | CTGTGS | 11 | 6 | 211  | 2065 | 34460  | 485512 | 0.102179177 | 0.070976618 | 0,00000012  | 0,0041     |
| 88  | BLCA | Bladder    | uCpGs | ACGMAA | 3  | 6 | 89   | 3401 | 6952   | 485512 | 0.026168774 | 0.014318905 | 0,00000013  | 0,0045     |
| 89  | PRAD | Prostate   | sCpGs | ACGTCT | 3  | 6 | 112  | 3369 | 7791   | 485512 | 0.033244286 | 0.016046977 | 2,9E-12     | 0,00000006 |
| 90  | BRCA | Breast     | sCpGs | CGTCT  | 12 | 5 | 176  | 3402 | 13935  | 485512 | 0.051734274 | 0.028701659 | 3,3E-13     | 6,9E-09    |
| 91  | UCEC | Uterus2    | sCpGs | CGTCT  | 12 | 5 | 190  | 3374 | 14240  | 485512 | 0.056312982 | 0.029329862 | 1,2E-16     | 2,5E-12    |
| 92  | ESCA | Esophagus  | uCpGs | CGSSG  | 12 | 5 | 1528 | 3397 | 146635 | 485512 | 0.449808655 | 0.302021371 | 6,2E-73     | 2,5E-68    |
| 93  | BLCA | Bladder    | sCpGs | CGCSS  | 12 | 5 | 2645 | 3425 | 154995 | 485512 | 0.772262774 | 0.319240307 | 0           | 0          |
| 94  | BRCA | Breast     | sCpGs | CGCSR  | 12 | 5 | 2426 | 3402 | 132630 | 485512 | 0.713109935 | 0.273175534 | 0           | 0          |
| 95  | PRAD | Prostate   | sCpGs | CGCSR  | 12 | 5 | 2435 | 3369 | 132630 | 485512 | 0.7227664   | 0.273175534 | 0           | 0          |
| 96  | EPIC | Blood3     | uCpGs | CCTGS  | 10 | 5 | 793  | 2065 | 157016 | 485512 | 0.38401937  | 0.323402923 | 3,9E-09     | 0,00014    |
| 97  | UCEC | Uterus2    | sCpGs | BCGCS  | 35 | 5 | 2841 | 3374 | 190868 | 485512 | 0.842027267 | 0.393127255 | 0           | 0          |
| 98  | THCA | Thyroid    | sCpGs | SCGCS  | 35 | 5 | 2684 | 3399 | 164180 | 485512 | 0.789644013 | 0.33815848  | 0           | 0          |
| 99  | LUSC | Lung2      | sCpGs | SCGCS  | 35 | 5 | 2869 | 3403 | 164180 | 485512 | 0.843079636 | 0.33815848  | 0           | 0          |
| 100 | LIHC | Liver      | sCpGs | SCGCS  | 35 | 5 | 2849 | 3336 | 164180 | 485512 | 0.854016787 | 0.33815848  | 0           | 0          |
| 101 | HNSC | Head and n | sCpGs | SCGCS  | 35 | 5 | 2809 | 3361 | 164180 | 485512 | 0.835763166 | 0.33815848  | 0           | 0          |
| 102 | KIRC | Kidney2    | sCpGs | SCGCS  | 35 | 5 | 2771 | 3297 | 164180 | 485512 | 0.840461025 | 0.33815848  | 0           | 0          |
| 103 | UCEC | Uterus2    | uCpGs | TTWNW  | 24 | 5 | 1993 | 3374 | 205049 | 485512 | 0.590693539 | 0.422335596 | 1,9E-85     | 8,3E-81    |
| 104 | HNSC | Head and n | uCpGs | ATTCT  | 15 | 5 | 223  | 3360 | 22432  | 485512 | 0.066369048 | 0.046202772 | 0,00000001  | 0,0031     |
| 105 | KIRC | Kidney2    | uCpGs | AKRAA  | 17 | 5 | 1049 | 3297 | 129061 | 485512 | 0.318168032 | 0.265824532 | 1,6E-11     | 0,00000064 |
| 106 | HNSC | Head and n | uCpGs | AAWGA  | 16 | 5 | 315  | 3360 | 34311  | 485512 | 0.09375     | 0.070669726 | 0,000000037 | 0,011      |
| 107 | LUSC | Lung2      | uCpGs | AAAYR  | 16 | 5 | 932  | 3385 | 106570 | 485512 | 0.275332349 | 0.219500239 | 1,6E-14     | 6,4E-10    |
| 108 | THCA | Thyroid    | uCpGs | AAAYA  | 16 | 5 | 590  | 3401 | 58773  | 485512 | 0.173478389 | 0.121053651 | 5,4E-19     | 2,1E-14    |



**Table S3.** Cancer tissues considered in this study.

| <b>ABBR.</b> | <b>Cancer type</b>                                               |
|--------------|------------------------------------------------------------------|
| ACC          | Adrenocortical carcinoma                                         |
| BLCA         | Bladder Urothelial Carcinoma                                     |
| BRCA         | Breast invasive carcinoma                                        |
| CESC         | Cervical squamous cell carcinoma and endocervical adenocarcinoma |
| CHOL         | Cholangiocarcinoma                                               |
| COAD         | Colon adenocarcinoma                                             |
| DLBC         | Lymphoid Neoplasm Diffuse Large B-cell Lymphoma                  |
| ESCA         | Esophageal carcinoma                                             |
| GBM          | Glioblastoma multiforme                                          |
| HNSC         | Head and Neck squamous cell carcinoma                            |
| KICH         | Kidney Chromophobe                                               |
| KIRC         | Kidney renal clear cell carcinoma                                |
| KIRP         | Kidney renal papillary cell carcinoma                            |
| LAML         | Acute Myeloid Leukemia                                           |
| LGG          | Brain Lower Grade Glioma                                         |
| LIHC         | Liver hepatocellular carcinoma                                   |
| LUAD         | Lung adenocarcinoma                                              |
| LUSC         | Lung squamous cell carcinoma                                     |
| MESO         | Mesothelioma                                                     |
| OV           | Ovarian serous cystadenocarcinoma                                |
| PAAD         | Pancreatic adenocarcinoma                                        |
| PCPG         | Pheochromocytoma and Paraganglioma                               |
| PRAD         | Prostate adenocarcinoma                                          |
| SARC         | Sarcoma                                                          |
| SKCM         | Skin Cutaneous Melanoma                                          |
| STAD         | Stomach adenocarcinoma                                           |
| TGCT         | Testicular Germ Cell Tumors                                      |
| THCA         | Thyroid carcinoma                                                |
| THYM         | Thymoma                                                          |
| UCEC         | Uterine Corpus Endometrial Carcinoma                             |
| UCS          | Uterine Carcinosarcoma                                           |
| UVM          | Uveal Melanoma                                                   |

**Table S4.** DNA motifs associated with Hyper-iDMC and Hypo-iDMC in cancer tissues. Columns legend: **Tissue ID** - TCGA tissue identification; **Tissue** - tissue name; **Motif** - the identified sequence motif; **Consensus Sequence** - consensus sequences; **Cluster** - motif cluster id; **Length** - length of the identified motif; **Positives** - number of CpGs with the corresponding motif in the input set; **Total positive** - number of total CpGs in the input set; **Negative** - number of CpGs with the corresponding motif in the background set; **Total negative** - Number of total CpGs in the background set; **Positive ratio** - ratio between Positive and Total positive; **Negative ratio** - ratio between Negative and Total negative; **p-value** - motif enrichment P-value; **e-value** - motif enrichment e-value; **Number hyper** - number of Hyper-methylated informative Differentially Methylated CpGs (Hyper-iDMC) in the input set; **Number hypo** - number of Hypo-methylated informative Differentially Methylated CpGs (Hypo-iDMC) in the input set; **Total hyper** - number of total Hyper-methylated informative Differentially Methylated CpGs (Hyper-iDMC) present in the array; **Total hypo** - number of total Hypo-methylated informative Differentially Methylated CpGs (Hypo-iDMC) present in the array; **Motif label** - motif labelled as hyper-methylated if more than 70% of the iDMC carrying the motif were marked as hyper-methylated in the lesion samples as compared to their matched controls, hypo-methylated if more of the 70% of the iDMC carrying the motif were hypo-methylated, undefined otherwise.

| Tissue ID | Tissue                                                           | Motif    | Consensus Sequence | Cluster | Length | Positive | Total positive | Negative | Total negative | Positive ratio | Negative ratio | p-value     | e-value     | Number hyper | Number hypo | Total hyper | Total hypo | Motif label |           |       |
|-----------|------------------------------------------------------------------|----------|--------------------|---------|--------|----------|----------------|----------|----------------|----------------|----------------|-------------|-------------|--------------|-------------|-------------|------------|-------------|-----------|-------|
| PAAD      | Pancreatic adenocarcinoma                                        | SCGA     | BCGV               | 27      | 4      | 457      | 1000           | 176151   | 485512         | 0.457          | 0.362814925    | 6.6E-10     | 0.000014    | 397          | 133         | 649         | 351        | Hyper       |           |       |
| STAD      | Stomach adenocarcinoma                                           | SCGA     |                    |         | 4      | 236      | 1000           | 84911    | 485512         | 0.236          | 0.174889601    | 0.0000062   | 0.011       | 580          | 31          | 901         | 99         | Hyper       |           |       |
| UCEC      | Uterine Corpus Endometrial Carcinoma                             | BCGS     |                    |         | 4      | 765      | 1000           | 307805   | 485512         | 0.765          | 0.633980211    | 4.4E-19     | 1.1E-14     | 747          | 160         | 784         | 216        | Hyper       |           |       |
| PAAD      | Pancreatic adenocarcinoma                                        | SCGS     |                    |         | 4      | 708      | 1000           | 258736   | 485512         | 0.708          | 0.532913708    | 9.9E-30     | 2.5E-25     | 592          | 180         | 674         | 351        | Hyper       |           |       |
| STAD      | Stomach adenocarcinoma                                           | GCGS     |                    |         | 4      | 530      | 1000           | 163336   | 485512         | 0.53           | 0.336420109    | 3.3E-36     | 7.6E-32     | 782          | 11          | 901         | 99         | Hyper       |           |       |
| ESCA      | Esophageal carcinoma                                             | CBCGA    | CBCGA              | 12      | 5      | 210      | 1000           | 68674    | 485512         | 0.21           | 0.141446555    | 2.7E-09     | 0.000073    | 166          | 67          | 562         | 438        | Hyper       |           |       |
| LUSC      | Lung Squamous cell carcinoma                                     | CBCGA    |                    |         | 5      | 85       | 1000           | 23350    | 485512         | 0.085          | 0.048093559    | 0.0000049   | 0.014       | 18           | 67          | 223         | 777        | Hyper       |           |       |
| SKCM      | Skin Cutaneous Melanoma                                          | CBCGA    |                    |         | 5      | 449      | 1000           | 169003   | 485512         | 0.449          | 0.348092323    | 3E-11       | 8.3E-07     | 121          | 328         | 317         | 683        | Hyper       |           |       |
| TGCT      | Testicular Germ Cell Tumors                                      | CBCGA    | ...CMGB            | 12      | 5      | 441      | 1000           | 162090   | 485512         | 0.441          | 0.333853746    | 1.3E-12     | 2.8E-08     | 0            | 588         | 0           | 1000       | Hyper       |           |       |
| TGCT      | Testicular Germ Cell Tumors                                      | CVACAGC  |                    |         | 7      | 39       | 1000           | 7599     | 485512         | 0.039          | 0.015651518    | 0.0000039   | 0.0076      | 0            | 52          | 0           | 1000       | Hyper       |           |       |
| LGG       | Brain Lower Grade Glioma                                         | CMGC     |                    |         | 4      | 729      | 1000           | 311487   | 485512         | 0.729          | 0.641563957    | 2.5E-09     | 0.000068    | 477          | 252         | 637         | 363        | Undefined   |           |       |
| PCPG      | Pheochromocytoma and Paraganglioma                               | CAGK     | ....SBCG           | 29      | 4      | 591      | 1000           | 251474   | 485512         | 0.591          | 0.517956302    | 0.0000021   | 0.024       | 28           | 675         | 34          | 966        | Hyper       |           |       |
| STAD      | Stomach adenocarcinoma                                           | CBCG     |                    |         | 4      | 588      | 1000           | 207348   | 485512         | 0.588          | 0.427070804    | 1.3E-24     | 2.6E-20     | 802          | 54          | 901         | 99         | Hyper       |           |       |
| TGCT      | Testicular Germ Cell Tumors                                      | CGACSTCG | HSSV..             | 10      | 5      | 864      | 1000           | 270863   | 485512         | 0.864          | 0.657891463    | 2.2E-96     | 5.6E-92     | 845          | 19          | 947         | 53         | Hyper       |           |       |
| COAD      | Colon adenocarcinoma                                             | HSCGS    |                    |         | 5      | 485      | 1000           | 172291   | 485512         | 0.485          | 0.354864555    | 2.5E-17     | 6.7E-13     | 305          | 180         | 538         | 462        | Undefined   |           |       |
| UCS       | Uterine Carcinosarcoma                                           | CGSGS    |                    |         | 7      | 33       | 1000           | 4889     | 485512         | 0.033          | 0.010069782    | 7.1E-09     | 0.00019     | 28           | 5           | 546         | 454        | Hyper       |           |       |
| PRAD      | Prostate adenocarcinoma                                          | CGCGGWC  |                    |         | 6      | 182      | 1000           | 41098    | 485512         | 0.182          | 0.084648783    | 1.7E-22     | 4.9E-18     | 174          | 8           | 562         | 438        | Hyper       |           |       |
| ESCA      | Esophageal carcinoma                                             | CGCGSR   |                    |         | 10     | 6        | 125            | 1000     | 24354          | 485512         | 0.125          | 0.050161479 | 2.8E-20     | 8E-16        | 122         | 3           | 498        | 502         | Hyper     |       |
| LUAD      | Lung adenocarcinoma                                              | CGCGVA   | .BVGCN.            | 6       | 6      | 141      | 1000           | 76082    | 485512         | 0.341          | 0.156704675    | 1.4E-46     | 3.9E-42     | 317          | 24          | 649         | 351        | Hyper       |           |       |
| PAAD      | Pancreatic adenocarcinoma                                        | BGCSCG   |                    |         | 6      | 143      | 1000           | 37000    | 485512         | 0.143          | 0.076208209    | 5.3E-13     | 1.5E-08     | 141          | 2           | 569         | 431        | Hyper       |           |       |
| BRCA      | Breast invasive carcinoma                                        | GGCGGB   |                    |         | 6      | 154      | 1000           | 47945    | 485512         | 0.154          | 0.098751421    | 0.00000003  | 0.00083     | 189          | 18          | 498         | 502        | Hyper       |           |       |
| LUAD      | Lung adenocarcinoma                                              | GMGCGS   |                    |         | 6      | 620      | 1000           | 133078   | 485512         | 0.62           | 0.274098272    | 6.8E-115    | 1.8E-110    | 611          | 9           | 901         | 99         | Hyper       |           |       |
| STAD      | Stomach adenocarcinoma                                           | BSSGCG   |                    |         | 6      | 5        | 522            | 1000     | 152090         | 485512         | 0.522          | 0.313256933 | 1.5E-42     | 4.3E-38      | 508         | 14          | 885        | 115         | Hyper     |       |
| CHOL      | Cholangiocarcinoma                                               | BCGCR    |                    |         | 6      | 5        | 697            | 1000     | 162235         | 485512         | 0.697          | 0.3341524   | 7.4E-121    | 2E-116       | 691         | 6           | 966        | 34          | Hyper     |       |
| CECSC     | Cervical squamous cell carcinoma and endocervical adenocarcinoma | BCGCK    |                    |         | 6      | 5        | 546            | 1000     | 162235         | 485512         | 0.546          | 0.3341524   | 6.3E-43     | 1.7E-38      | 482         | 64          | 784        | 216         | Hyper     |       |
| UCEC      | Uterine Corpus Endometrial Carcinoma                             | BCGCK    | CGMWAYB.           | 7       | 7      | 26       | 1000           | 2901     | 485512         | 0.026          | 0.005975136    | 1.1E-09     | 0.000031    | 4            | 22          | 289         | 711        | Hyper       |           |       |
| DLBC      | Lymphoid Neoplasm Diffuse Large B-cell Lymphoma                  | CGAAATB  |                    |         | 8      | 9        | 1000           | 365      | 485512         | 0.009          | 0.000751784    | 0.0000012   | 0.003       | 9            | 0           | 562         | 438        | Hyper       |           |       |
| ESCA      | Esophageal carcinoma                                             | CGCTAYCG |                    |         | 7      | 3        | 701            | 1000     | 257577         | 485512         | 0.701          | 0.530526537 | 3.4E-28     | 7.8E-24      | 906         | 21          | 966        | 34          | Hyper     |       |
| CECSC     | Cervical squamous cell carcinoma and endocervical adenocarcinoma | CGC      | CGV                | 7       | 3      | 634      | 1000           | 264998   | 485512         | 0.634          | 0.545811432    | 0.00000001  | 0.00026     | 779          | 49          | 885         | 115        | Hyper       |           |       |
| CHOL      | Cholangiocarcinoma                                               | CGC      |                    |         | 3      | 940      | 1000           | 430512   | 485512         | 0.94           | 0.866717527    | 5.9E-09     | 0.00016     | 559          | 391         | 569         | 431        | Undefined   |           |       |
| BRCA      | Breast invasive carcinoma                                        | CGR      |                    |         | 7      | 3        | 464            | 1000     | 187427         | 485512         | 0.464          | 0.386039892 | 0.0000032   | 0.0053       | 942         | 45          | 947        | 53          | Hyper     |       |
| COAD      | Colon adenocarcinoma                                             | CGS      |                    |         | 11     | 4        | 528            | 1000     | 202876         | 485512         | 0.528          | 0.417859099 | 1.6E-12     | 4.6E-08      | 260         | 268         | 481        | 519         | Undefined |       |
| COAD      | Colon adenocarcinoma                                             | CGSM     | YGSB               | 11      | 4      | 626      | 1000           | 231504   | 485512         | 0.626          | 0.476824466    | 2E-21       | 4.1E-17     | 905          | 24          | 947         | 53         | Hyper       |           |       |
| TGCT      | Testicular Germ Cell Tumors                                      | CGSW     |                    |         | 4      | 809      | 1000           | 335461   | 485512         | 0.809          | 0.690942757    | 2.3E-17     | 6.1E-13     | 0            | 809         | 0           | 1000       | Hyper       |           |       |
| BLCA      | Bladder Urothelial Carcinoma                                     | CAYA     |                    |         | 5      | 4        | 399            | 1000     | 156271         | 485512         | 0.399          | 0.321868461 | 0.0000018   | 0.0038       | 11          | 437         | 77         | 922         | Hyper     |       |
| OV        | Ovarian serous cystadenocarcinoma                                | CATB     |                    |         | 5      | 4        | 503            | 1000     | 208509         | 485512         | 0.503          | 0.429462094 | 0.0000018   | 0.047        | 7           | 537         | 12         | 988         | Hyper     |       |
| KICH      | Kidney Chromophobe                                               | AWYA     |                    |         | 5      | 4        | 610            | 1000     | 213547         | 485512         | 0.61           | 0.439838768 | 2.8E-27     | 8.6E-23      | 9           | 601         | 20         | 980         | Hyper     |       |
| THCA      | Thyroid carcinoma                                                | MACW     | WNRN               | 5       | 4      | 690      | 1000           | 280576   | 485512         | 0.69           | 0.577897148    | 2E-13       | 4.6E-09     | 97           | 671         | 157         | 843        | Hyper       |           |       |
| THCA      | Thyroid carcinoma                                                | TSAR     |                    |         | 3      | 4        | 721            | 1000     | 287700         | 485512         | 0.721          | 0.592570318 | 2E-17       | 5.7E-13      | 99          | 622         | 157        | 843         | Hyper     |       |
| ACC       | Adrenocortical carcinoma                                         | TKAW     |                    |         | 3      | 4        | 529            | 1000     | 215142         | 485512         | 0.529          | 0.44312396  | 0.00000032  | 0.00091      | 134         | 398         | 356        | 644         | Hyper     |       |
| LIHC      | Liver hepatocellular carcinoma                                   | WGAW     |                    |         | 3      | 4        | 554            | 1000     | 226184         | 485512         | 0.554          | 0.465866961 | 0.00000015  | 0.00034      | 28          | 693         | 63         | 937         | Hyper     |       |
| LIHC      | Liver hepatocellular carcinoma                                   | ATRR     |                    |         | 3      | 4        | 610            | 1000     | 216168         | 485512         | 0.61           | 0.445237193 | 1.1E-25     | 3.3E-21      | 12          | 598         | 63         | 937         | Hyper     |       |
| MESO      | Mesothelioma                                                     | AWAD     |                    |         | 3      | 4        | 663            | 1000     | 251333         | 485512         | 0.663          | 0.517665887 | 1.1E-20     | 3.3E-16      | 90          | 573         | 187        | 813         | Hyper     |       |
| PRAD      | Prostate adenocarcinoma                                          | DTAAA    | DTWAA              | 3       | 5      | 210      | 1000           | 62302    | 485512         | 0.21           | 0.128322266    | 5E-13       | 1.4E-08     | 42           | 168         | 546         | 454        | Hyper       |           |       |
| UVM       | Uveal Melanoma                                                   | RTTAA    |                    |         | 3      | 5        | 97             | 1000     | 25684          | 485512         | 0.097          | 0.052900855 | 0.000000013 | 0.00037      | 30          | 67          | 278        | 722         | Undefined |       |
| KICH      | Kidney Chromophobe                                               | TAA      | TBA                | 20      | 3      | 291      | 1000           | 109908   | 485512         | 0.291          | 0.226375455    | 0.0000013   | 0.024       | 3            | 529         | 20          | 980        | Hyper       |           |       |
| MESO      | Mesothelioma                                                     | TBA      |                    |         | 3      | 789      | 1000           | 347516   | 485512         | 0.789          | 0.715772216    | 0.00000008  | 0.0018      | 141          | 725         | 187         | 813        | Hyper       |           |       |
| UVM       | Uveal Melanoma                                                   | CAYGTGA  |                    |         | 20     | 7        | 32             | 1000     | 4734           | 485512         | 0.032          | 0.009750531 | 0.000000012 | 0.00033      | 1           | 31          | 278        | 722         | Hyper     |       |
| UVM       | Uveal Melanoma                                                   | TCATATGA | .CAYGTGA           | 20      | 8      | 5        | 1000           | 84       | 485512         | 0.005          | 0.000173013    | 0.0000013   | 0.037       | 0            | 5           | 278         | 722        | Hyper       |           |       |
| PCPG      | Pheochromocytoma and Paraganglioma                               | AAACGW   |                    |         | AAACGW | 28       | 6              | 39       | 1000           | 7772           | 485512         | 0.039       | 0.016007843 | 0.00000067   | 0.0079      | 1           | 56         | 34          | 966       | Hyper |
| PCPG      | Pheochromocytoma and Paraganglioma                               | ASA      |                    |         |        |          | 3              | 907      | 1000           | 403145         | 485512         | 0.907       | 0.830350228 | 2.8E-12      | 5.4E-08     | 28          | 928        | 34          | 966       | Hyper |
| KICH      | Kidney Chromophobe                                               | ATW      |                    |         |        |          | 3              | 503      | 1000           | 194567         | 485512         | 0.503       | 0.400746017 | 4.2E-11      | 0.000001    | 7           | 658        | 20          | 980       | Hyper |
| PCPG      | Pheochromocytoma and Paraganglioma                               | ATH      |                    |         |        |          | 3              | 799      | 1000           | 326661         | 485512         | 0.799       | 0.672817562 | 5.4E-19      | 1.6E-14     | 28          | 771        | 34          | 966       | Hyper |
| LIHC      | Liver hepatocellular carcinoma                                   | AGACTMA  | .DRANTMA           | 2       | 7      | 20       | 1000           | 2259     | 485512         | 0.02           | 0.00465282     | 0.00000011  | 0.002       | 3            | 22          | 63          | 937        | Hyper       |           |       |
| KIRP      | Kidney renal papillary cell carcinoma                            | TGACTMA  |                    |         | 7      | 28       | 1000           | 3404     | 485512         | 0.028          | 0.007011155    | 1.6E-09     | 0.000046    | 1            | 27          | 467         | 537        | Hyper       |           |       |
| HN5C      | Head and Neck squamous cell carcinoma                            | TGABTCA  |                    |         | 7      | 53       | 1000           | 3925     | 485512         | 0.053          | 0.008084249    | 5.1E-26     | 1.5E-21     | 0            | 53          | 226         | 774        | Hyper       |           |       |
| MESO      | Mesothelioma                                                     | TGACTCA  |                    |         | 7      | 28       | 1000           | 2225     | 485512         | 0.028          | 0.004582791    | 1.1E-13     | 2.5E-09     | 0            | 31          | 187         | 813        | Hyper       |           |       |
| LIHC      | Liver hepatocellular carcinoma                                   | GKAACTCA |                    |         | 8      | 10       | 1000           | 676      | 485512         | 0.01           | 0.001392345    | 0.0000022   | 0.041       | 0            | 11          | 63          | 937        | Hyper       |           |       |
| ACC       | Adrenocortical carcinoma                                         | RTGACTCA |                    |         | 8      | 17       | 1000           | 1373     | 485512         | 0.017          | 0.002827942    | 9.2E-09     | 0.00026     | 0            | 17          | 356         | 644        | Hyper       |           |       |
| ESCA      | Esophageal carcinoma                                             | MTGASTCA |                    |         | 8      | 26       | 1000           | 1869     | 485512         | 0.026          | 0.003849544    | 9.2E-14     | 2.5E-09     | 0            | 26          | 562         | 438        | Hyper       |           |       |
| BLCA      | Bladder Urothelial Carcinoma                                     | RTGAVTCA |                    |         | 8      | 62       | 1000           | 2630     | 485512         | 0.062          | 0.005416962    | 1.8E-43     | 5.1E-39     | 0            | 62          | 77          | 923        | Hyper       |           |       |
| PAAD      | Pancreatic adenocarcinoma                                        | ATGASTCA | ..DSD..            | 2       | 8      | 14       | 1000           | 857      | 485512         | 0.014          | 0.001765147    | 6.5E-09     | 0.00012     | 0            | 14          | 649         | 351        | Hyper       |           |       |
| MESO      | Mesothelioma                                                     | GGWGGTA  |                    |         | 7      | 17       | 1000           | 2092     | 485512         | 0.017          | 0.004308853    | 0.0000029   | 0.045       | 2            | 15          | 187         | 813        | Hyper       |           |       |
| KIRC      | Kidney renal clear cell carcinoma                                | GWGTCA   |                    |         | 6      | 84       | 1000           | 16254    | 485512         | 0.084          | 0.03347806     | 4.9E-14     | 1.4E-09     | 5            | 79          | 145         | 855        | Hyper       |           |       |
| KIRC      | Kidney renal clear cell carcinoma                                | KGTYA    |                    |         | 5      | 253      | 1000           | 83419    | 485512         | 0.253          | 0.171816557    | 6.9E-11     | 0.000002    | 19           | 260         | 145         | 855        | Hyper       |           |       |
| OV        | Ovarian serous cystadenocarcinoma                                | GGRC     |                    |         | 5      | 287      | 1000           | 100036   | 485512         | 0.287          | 0.206042281    | 7.9E-10     | 0.000022    | 1            | 286         | 12          | 988        | Hyper       |           |       |
| KICH      | Kidney Chromophobe                                               | TGTGW    | TGTGW              | 19      | 5      | 143      | 1000           | 45981    | 485512         | 0.143          | 0.094708207    | 0.0000063   | 0.012       | 3            | 217         | 20          | 980        | Hyper       |           |       |
| LGG       | Brain Lower Grade Glioma                                         | AARGTGT  |                    |         | 8      | 11       | 1000           | 683      | 485512         | 0.011          | 0.001406762    | 0.00000031  | 0.0072      | 9            | 2           | 637         | 363        | Hyper       |           |       |
| UCS       | Uterine Carcinosarcoma                                           | AGKGCAGC | ARDGSDVH           | 19      | 8      | 21       | 1000           | 2888     | 485512         | 0.021          | 0.00594836     | 0.0000012   | 0.03        | 9            | 12          | 538         | 462        | Undefined   |           |       |
| LAML      | Acute Myeloid Leukemia                                           | AGGGCTSA |                    |         | 8      | 18       | 1000           | 1890     | 485512         | 0.018          | 0.003892798    | 0.00000016  | 0.0042      | 8            | 11          | 408         | 592        | Undefined   |           |       |
| UCS       | Uterine Carcinosarcoma                                           | AGGGCGAA |                    |         | 8      | 9        | 1000           | 483      | 485512         | 0.009          | 0.000994826    | 0.0000011   | 0.028       | 8            | 1           | 538         | 462        | Hyper       |           |       |
| BLCA      | Bladder Urothelial Carcinoma                                     | MWGA     |                    |         | 4      | 4        | 802            | 1000     | 341449         | 485512         | 0.802          | 0.703276129 | 8.5E-13     | 2.4E-08      | 50          | 773         | 77         | 923         | Hyper     |       |
| KIRC      | Kidney renal clear cell carcinoma                                | AKGA     |                    |         | 4      | 4        | 515            | 1000     | 211618         | 485512         | 0.515          | 0.4386865   |             |              |             |             |            |             |           |       |

|      |                                                                  |          |             |    |   |     |      |        |        |       |             |            |          |     |     |     |      |           |
|------|------------------------------------------------------------------|----------|-------------|----|---|-----|------|--------|--------|-------|-------------|------------|----------|-----|-----|-----|------|-----------|
| OV   | Ovarian serous cystadenocarcinoma                                | ATGAYCGC | ATGABS.     | 4  | 8 | 6   | 1000 | 111    | 485512 | 0,006 | 0,000228625 | 0,00000019 | 0,0044   | 0   | 6   | 12  | 988  | Hypo      |
| LUAD | Lung adenocarcinoma                                              | ATGACWVC |             | 4  | 7 | 23  | 1000 | 2819   | 485512 | 0,023 | 0,005806242 | 0,00000052 | 0,0014   | 4   | 19  | 498 | 502  | Hypo      |
| LUSC | Lung squamous cell carcinoma                                     | ATGASTC  |             | 4  | 7 | 23  | 1000 | 2603   | 485512 | 0,023 | 0,00536135  | 0,00000013 | 0,00037  | 1   | 22  | 223 | 777  | Hypo      |
| LUSC | Lung squamous cell carcinoma                                     | ATGWITG  |             | 16 | 6 | 46  | 1000 | 10170  | 485512 | 0,046 | 0,020946959 | 0,0000011  | 0,032    | 4   | 43  | 223 | 777  | Hypo      |
| HNSC | Head and Neck squamous cell carcinoma                            | GTGRTGA  | RTGDTG.     | 16 | 7 | 34  | 1000 | 4615   | 485512 | 0,034 | 0,009505429 | 4,9E-10    | 0,000014 | 1   | 37  | 226 | 774  | Hypo      |
| LUSC | Lung squamous cell carcinoma                                     | RTGGTGA  |             | 16 | 7 | 34  | 1000 | 4765   | 485512 | 0,034 | 0,009814382 | 1,1E-09    | 0,000031 | 2   | 32  | 223 | 777  | Hypo      |
| SARC | Sarcoma                                                          | GRGAA    | RRGVD       | 23 | 5 | 264 | 1000 | 96039  | 485512 | 0,264 | 0,197809735 | 0,00000025 | 0,0068   | 68  | 207 | 284 | 716  | Hypo      |
| LAML | Acute Myeloid Leukemia                                           | AGGVA    |             | 23 | 5 | 380 | 1000 | 140469 | 485512 | 0,380 | 0,289321376 | 4,6E-10    | 0,000013 | 129 | 251 | 408 | 592  | Undefined |
| TGCT | Testicular Germ Cell Tumors                                      | AGGAK    |             | 23 | 5 | 160 | 1000 | 53582  | 485512 | 0,16  | 0,110361845 | 0,0000013  | 0,026    | 0   | 236 | 0   | 1000 | Hypo      |
| LIHC | Liver hepatocellular carcinoma                                   | ARMAT    | ADVAB...    | 26 | 5 | 223 | 1000 | 67064  | 485512 | 0,223 | 0,138130468 | 2,8E-13    | 6,8E-09  | 4   | 297 | 63  | 937  | Hypo      |
| SARC | Sarcoma                                                          | ATGAB    |             | 26 | 5 | 202 | 1000 | 61871  | 485512 | 0,202 | 0,127434543 | 2,7E-11    | 7,8E-07  | 26  | 176 | 284 | 716  | Hypo      |
| SKCM | Skin Cutaneous Melanoma                                          | ATCGMGAT |             | 26 | 8 | 7   | 1000 | 238    | 485512 | 0,007 | 0,000490204 | 0,00000096 | 0,024    | 1   | 6   | 317 | 683  | Hypo      |
| LAML | Acute Myeloid Leukemia                                           | AMACCAC  | AVRHSAM     | 18 | 7 | 29  | 1000 | 4653   | 485512 | 0,029 | 0,009583697 | 0,00000029 | 0,0074   | 5   | 24  | 408 | 592  | Hypo      |
| KICH | Kidney Chromophobe                                               | AGGTSAC  |             | 18 | 7 | 32  | 1000 | 5238   | 485512 | 0,032 | 0,010788611 | 0,00000011 | 0,0021   | 0   | 33  | 20  | 980  | Hypo      |
| LUSC | Lung squamous cell carcinoma                                     | ASGACAA  |             | 18 | 7 | 23  | 1000 | 3111   | 485512 | 0,023 | 0,006407669 | 0,00000028 | 0,0082   | 3   | 20  | 223 | 777  | Hypo      |
| UCEC | Uterine Corpus Endometrial Carcinoma                             | AGCTTAMA | ASCTTAMA    | 30 | 8 | 9   | 1000 | 527    | 485512 | 0,009 | 0,001085452 | 0,00000023 | 0,044    | 7   | 2   | 784 | 216  | Hyper     |
| UCS  | Uterine Carcinosarcoma                                           | ASCTTAA  |             | 30 | 8 | 10  | 1000 | 593    | 485512 | 0,01  | 0,001221391 | 0,00000007 | 0,018    | 5   | 5   | 538 | 462  | Undefined |
| STAD | Stomach adenocarcinoma                                           | ARCCGAAC | DRCSGAAM    | 30 | 8 | 12  | 1000 | 479    | 485512 | 0,012 | 0,000986587 | 7,8E-10    | 0,000013 | 16  | 0   | 901 | 99   | Hyper     |
| UCEC | Uterine Corpus Endometrial Carcinoma                             | KACGGAAA |             | 30 | 8 | 11  | 1000 | 797    | 485512 | 0,011 | 0,001641566 | 0,0000013  | 0,026    | 9   | 2   | 784 | 216  | Hyper     |
| STAD | Stomach adenocarcinoma                                           | AACGGCCG | AMVBGCCB    | 9  | 8 | 6   | 1000 | 106    | 485512 | 0,006 | 0,000218326 | 0,00000015 | 0,0023   | 8   | 0   | 901 | 99   | Hyper     |
| CHOL | Cholangiocarcinoma                                               | ACSTGCCC |             | 9  | 8 | 17  | 1000 | 2000   | 485512 | 0,017 | 0,004119363 | 0,00000016 | 0,035    | 16  | 1   | 885 | 115  | Hyper     |
| HNSC | Head and Neck squamous cell carcinoma                            | ACASGCCT |             | 9  | 8 | 16  | 1000 | 1508   | 485512 | 0,016 | 0,003105999 | 0,00000019 | 0,0055   | 0   | 16  | 226 | 774  | Hypo      |
| LUAD | Lung adenocarcinoma                                              | CGCAGCGS | MBVMRDG.    | 25 | 8 | 20  | 1000 | 2388   | 485512 | 0,02  | 0,004918519 | 0,00000025 | 0,0069   | 24  | 0   | 498 | 502  | Hyper     |
| LUSC | Lung squamous cell carcinoma                                     | CCCCGWGG |             | 25 | 8 | 23  | 1000 | 3281   | 485512 | 0,023 | 0,006757814 | 0,00000007 | 0,02     | 2   | 21  | 223 | 777  | Hypo      |
| LGG  | Brain Lower Grade Glioma                                         | ATGCAGGG |             | 25 | 8 | 11  | 1000 | 622    | 485512 | 0,011 | 0,001281122 | 0,00000012 | 0,0029   | 7   | 4   | 637 | 363  | Undefined |
| THCA | Thyroid carcinoma                                                | ASAAGGG  |             | 25 | 7 | 26  | 1000 | 3818   | 485512 | 0,026 | 0,007863863 | 0,00000023 | 0,0043   | 3   | 28  | 157 | 843  | Hypo      |
| ACC  | Adrenocortical carcinoma                                         | CAAGGNCA | CMAGKNC.    | 1  | 8 | 44  | 1000 | 3307   | 485512 | 0,044 | 0,006811366 | 1,4E-21    | 4E-17    | 1   | 43  | 356 | 644  | Hypo      |
| THYM | Thymoma                                                          | CCAGKTC  |             | 1  | 7 | 35  | 1000 | 6779   | 485512 | 0,035 | 0,01396258  | 0,0000013  | 0,033    | 13  | 22  | 481 | 519  | Undefined |
| ESCA | Esophageal carcinoma                                             | CGTSGC   | VVTBGC.     | 14 | 6 | 74  | 1000 | 19938  | 485512 | 0,074 | 0,041065926 | 0,00000014 | 0,036    | 55  | 30  | 562 | 438  | Undefined |
| OV   | Ovarian serous cystadenocarcinoma                                | CAMTGCC  |             | 14 | 7 | 35  | 1000 | 5576   | 485512 | 0,035 | 0,011484783 | 0,00000015 | 0,0004   | 0   | 35  | 12  | 988  | Hypo      |
| GBM  | Glioblastoma multiforme                                          | GCTGGCY  |             | 14 | 7 | 57  | 1000 | 12794  | 485512 | 0,057 | 0,026351563 | 0,00000001 | 0,0028   | 13  | 44  | 336 | 664  | Hypo      |
| UCS  | Uterine Carcinosarcoma                                           | CGATKGCC |             | 14 | 8 | 11  | 1000 | 649    | 485512 | 0,011 | 0,001336733 | 0,00000019 | 0,0047   | 6   | 5   | 538 | 462  | Undefined |
| LUAD | Lung adenocarcinoma                                              | CCAGDTTA | SCRCDYTM    | 13 | 8 | 12  | 1000 | 839    | 485512 | 0,012 | 0,001728073 | 0,00000031 | 0,0084   | 4   | 8   | 498 | 502  | Undefined |
| ESCA | Esophageal carcinoma                                             | GCGCACTM |             | 13 | 8 | 10  | 1000 | 601    | 485512 | 0,01  | 0,001237868 | 0,00000079 | 0,02     | 13  | 0   | 562 | 438  | Hyper     |
| UCS  | Uterine Carcinosarcoma                                           | GCGCACTA |             | 13 | 8 | 6   | 1000 | 165    | 485512 | 0,006 | 0,000339847 | 0,00000018 | 0,044    | 6   | 0   | 538 | 462  | Hyper     |
| CESC | Cervical squamous cell carcinoma and endocervical adenocarcinoma | CCGAM    | ...CMGMM... | 8  | 5 | 162 | 1000 | 45345  | 485512 | 0,162 | 0,09339625  | 5,9E-12    | 1,1E-07  | 174 | 4   | 966 | 34   | Hyper     |
| PRAD | Prostate adenocarcinoma                                          | CGWCCGAA |             | 8  | 8 | 8   | 1000 | 267    | 485512 | 0,008 | 0,000549935 | 0,00000014 | 0,0038   | 8   | 0   | 546 | 454  | Hyper     |
| LUAD | Lung adenocarcinoma                                              | CCGAACCC |             | 8  | 8 | 13  | 1000 | 631    | 485512 | 0,013 | 0,001299659 | 1,5E-09    | 0,000043 | 11  | 2   | 498 | 502  | Hyper     |
| LUAD | Lung adenocarcinoma                                              | CAGMCCGC |             | 8  | 8 | 18  | 1000 | 2146   | 485512 | 0,018 | 0,004420076 | 0,00000097 | 0,026    | 14  | 6   | 498 | 502  | Undefined |
| HNSC | Head and Neck squamous cell carcinoma                            | CATYCA   | ..MAYHMR    | 15 | 6 | 63  | 1000 | 15273  | 485512 | 0,063 | 0,031457513 | 0,00000003 | 0,0085   | 4   | 61  | 226 | 774  | Hypo      |
| GBM  | Glioblastoma multiforme                                          | CACAAR   |             | 15 | 6 | 64  | 1000 | 16444  | 485512 | 0,064 | 0,0338694   | 0,00000016 | 0,046    | 10  | 54  | 336 | 664  | Hypo      |
| LIHC | Liver hepatocellular carcinoma                                   | CAMATTAA |             | 15 | 8 | 9   | 1000 | 447    | 485512 | 0,009 | 0,000920678 | 0,00000061 | 0,011    | 0   | 9   | 63  | 937  | Hypo      |
| KIRP | Kidney renal papillary cell carcinoma                            | GCTCAR   | RCWWMVR..   | 21 | 6 | 92  | 1000 | 25759  | 485512 | 0,092 | 0,053055331 | 0,00000036 | 0,01     | 36  | 56  | 467 | 533  | Undefined |
| OV   | Ovarian serous cystadenocarcinoma                                | GCTACATA |             | 21 | 8 | 6   | 1000 | 168    | 485512 | 0,006 | 0,000346026 | 0,0000002  | 0,045    | 0   | 6   | 12  | 988  | Hypo      |
| KICH | Kidney Chromophobe                                               | RCTAGA   |             | 21 | 6 | 34  | 1000 | 6638   | 485512 | 0,034 | 0,013672165 | 0,00000022 | 0,037    | 1   | 34  | 20  | 980  | Hypo      |
| OV   | Ovarian serous cystadenocarcinoma                                | GCAAGGRA |             | 21 | 8 | 13  | 1000 | 1149   | 485512 | 0,013 | 0,002366574 | 0,00000013 | 0,036    | 1   | 12  | 12  | 988  | Hypo      |

**Table S5.** Proportion of TFs associate with hyper- or hypo-methylated motifs divided by classification provided by MethylMinus/MethylMinus classification.

|             | Hypo-methylated motif | Not characterized motif | Hyper-methylated motif |
|-------------|-----------------------|-------------------------|------------------------|
| MethylMinus | 0.84                  | 0.06                    | 0.15                   |
| MethylPlus  | 0.71                  | 0.02                    | 0.27                   |
